# Supplementary material for: Reactivity of Pd–MO2 encapsulated catalytic systems for CO oxidation
Source: Royal Society of Chemistry journal article supplement (doi:10.1039/d1cy01916c), 2022-01-01
Supplement: d1cy01916c1.pdf [file d1cy01916c1.pdf]

## Electronic Supplementary Information

### Reactivity of Pd-MO encapsulated catalytic systems for CO oxidation

Laura Paz Herrera,<sup>a†</sup> Lucas Freitas de Lima e Freitas,<sup>b‡</sup> Jiyun Hong,<sup>c</sup> Adam S. Hoffman,<sup>c</sup> Simon R. Bare,<sup>c</sup>

Eranda Nikolla<sup>\*b</sup> and J. Will Medlin<sup>\*a</sup>

<sup>a</sup> *Department of Chemical and Biological Engineering, University of Colorado Boulder, Boulder, CO, USA*

80303

<sup>b</sup> *Department of Chemical Engineering and Materials Science, Wayne State University, Detroit, MI, USA*

48202

<sup>c</sup> *Stanford Synchrotron Radiation Lightsource, SLAC National Accelerator Laboratory, Menlo Park, CA, USA 94025*

#### \*Corresponding authors

**Email:** medlin@colorado.edu (J. Will Medlin)

**Email:** erandan@wayne.edu (E. Nikolla)

#### †Equal Contributions

#### Table of Contents

|                                    |           |
|------------------------------------|-----------|
| <b>Supplementary Figures</b> ..... | <b>2</b>  |
| <b>Supplementary Tables</b> .....  | <b>14</b> |

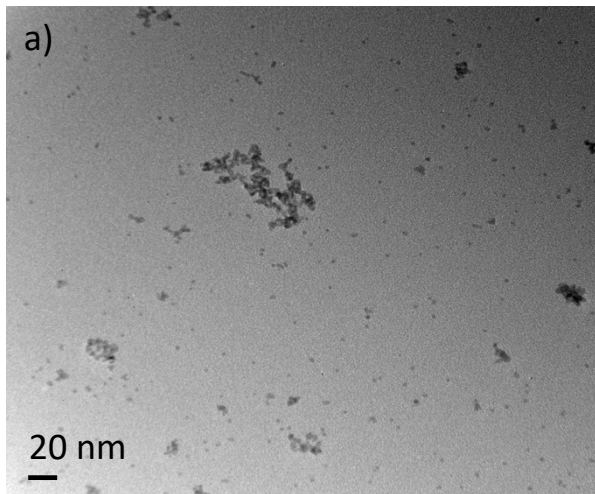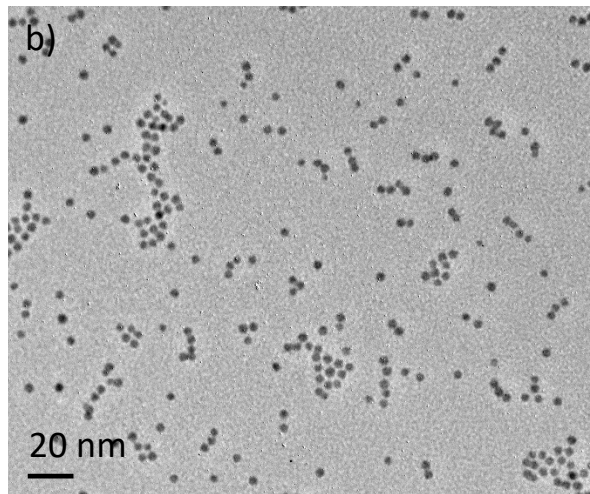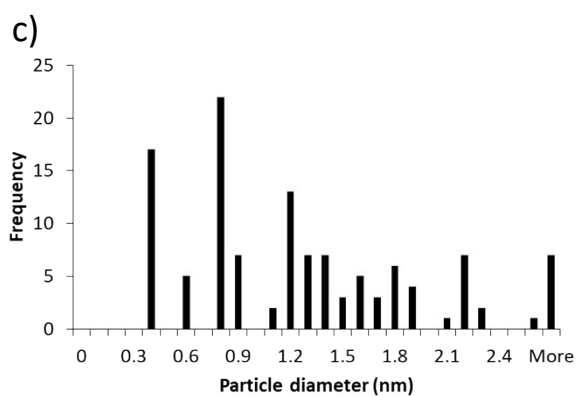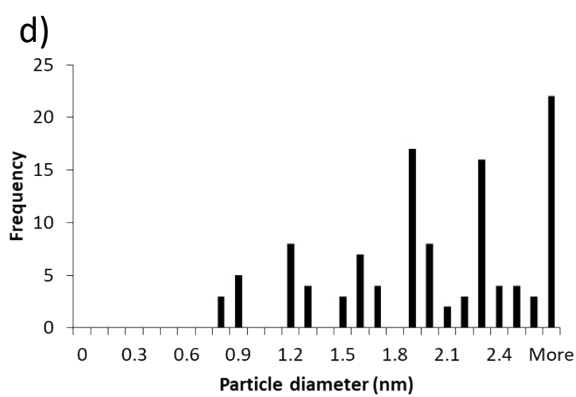

Figure S1: Transmission electron micrographs (TEM) of (a) Pd<sub>PEG</sub> NPs and (b) Pd<sub>TOP</sub> NPs in solution along with the histograms of the corresponding particle size distribution (panels (c), and (d), respectively).

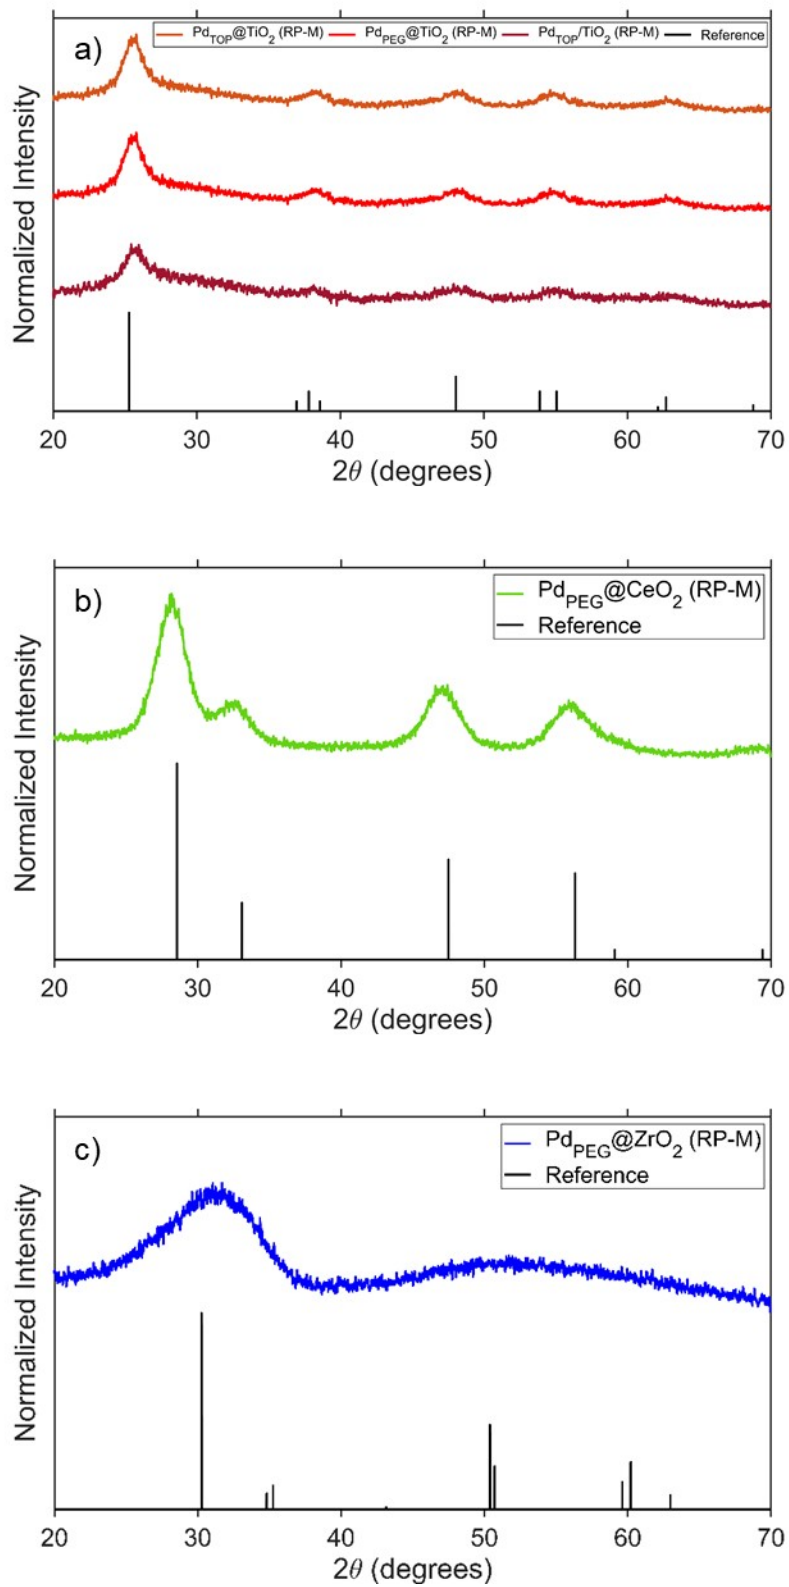

Figure S2: XRD spectra of (a) TiO<sub>2</sub>-based catalysts, (b) Pd<sub>PEG</sub>@CeO<sub>2</sub>, and (c) Pd<sub>PEG</sub>@ZrO<sub>2</sub> using an RP-M pretreatment within tetragonal anatase TiO<sub>2</sub>, cubic cerianite CeO<sub>2</sub>, and tetragonal ZrO<sub>2</sub> as a reference, respectively.

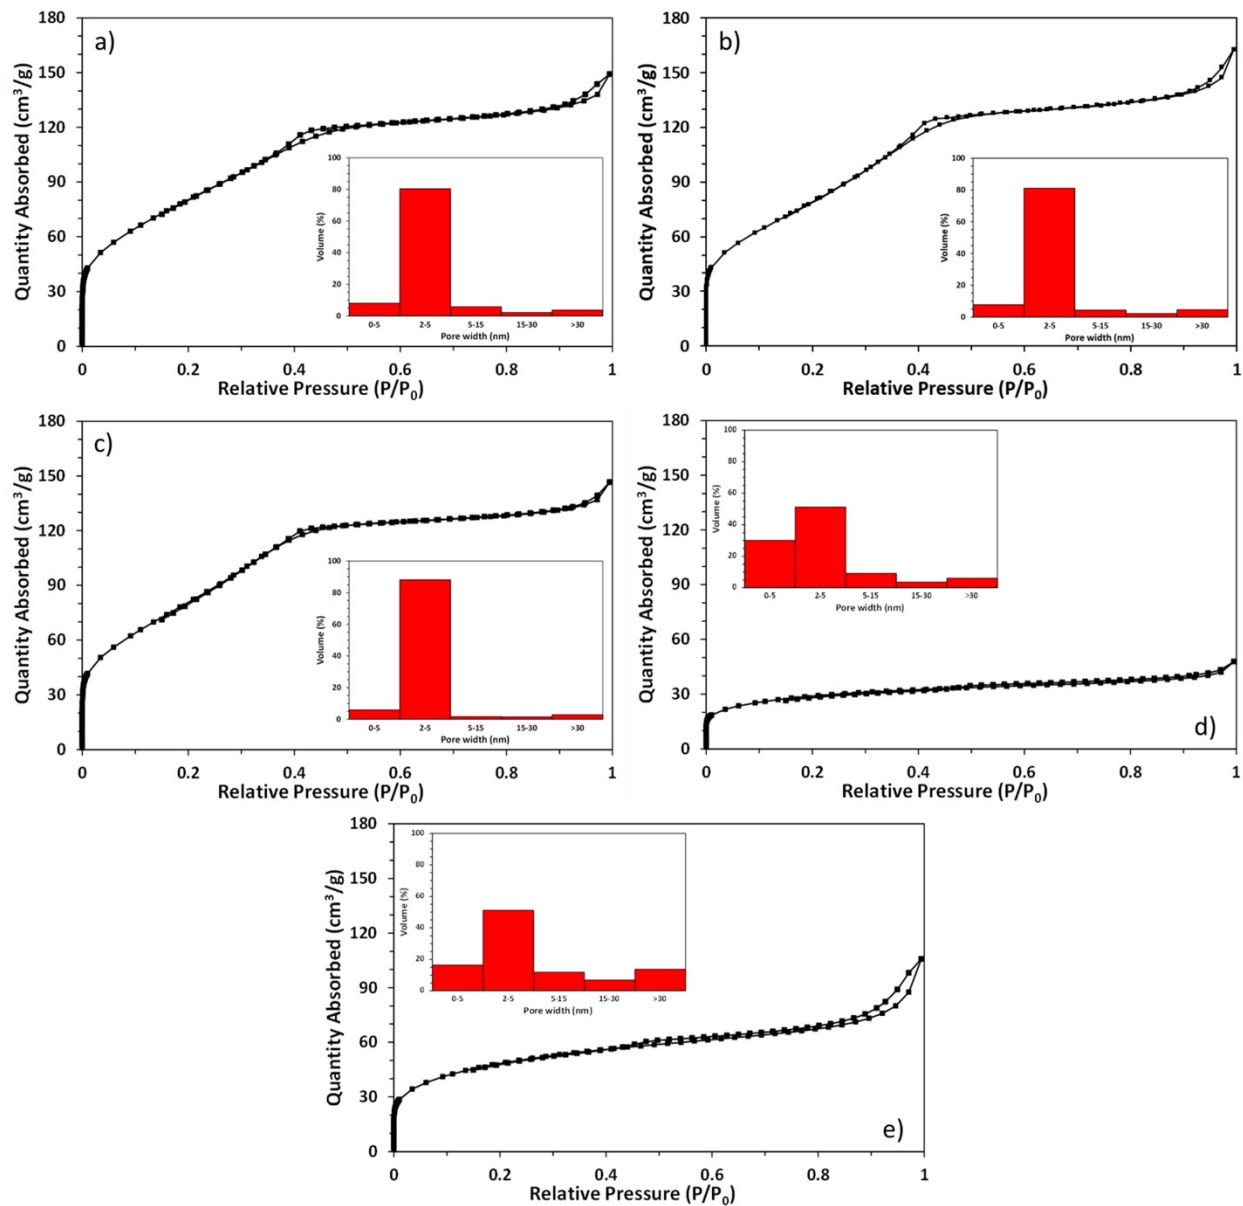

Figure S3:  $N_2$  physisorption isotherms and pore size distribution plots of  $TiO_2$  films on Pd NPs a)  $Pd_{TOP}@TiO_2$ , b)  $Pd_{PEG}@TiO_2$ , c)  $Pd_{TOP}/TiO_2$ , d)  $Pd_{PEG}@CeO_2$ , and e)  $Pd_{PEG}@ZrO_2$  using an RP-M pretreatment.

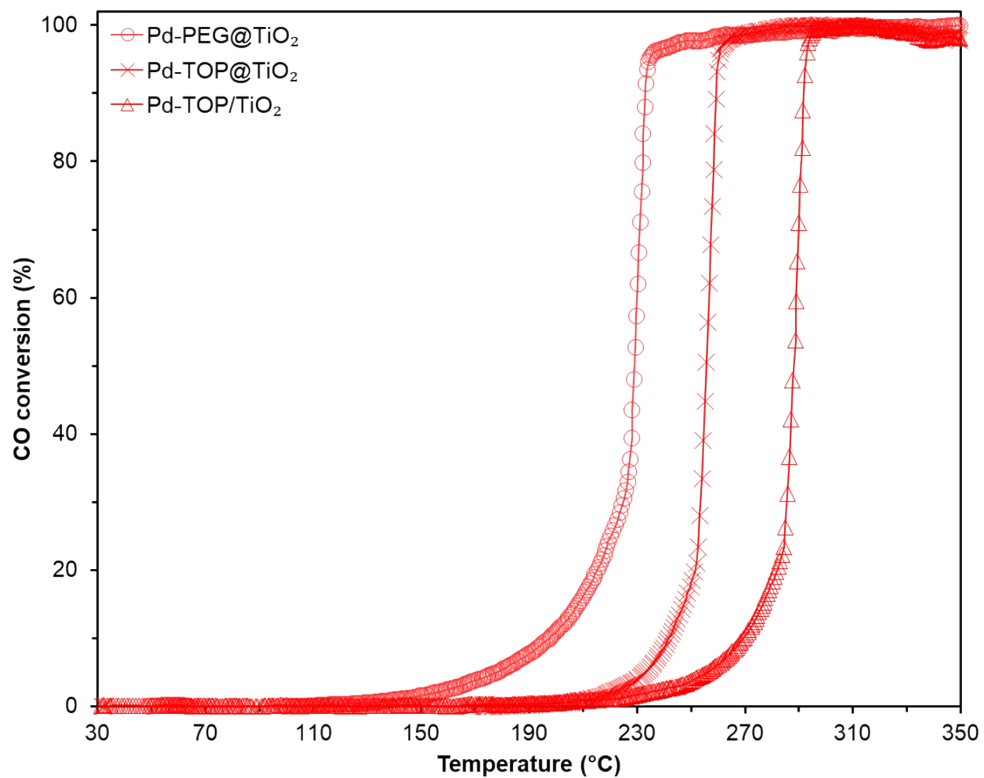

Figure S4: Light-off curves for CO oxidation reaction on encapsulated ( $\text{Pd}_{\text{PEG}}@\text{TiO}_2$ ,  $\text{Pd}_{\text{TOP}}@\text{TiO}_2$ ) and supported catalysts ( $\text{Pd}_{\text{TOP}}/\text{TiO}_2$ ), performed in gas-phase reactor. Before reaction, the catalysts underwent RP-M pretreatment.

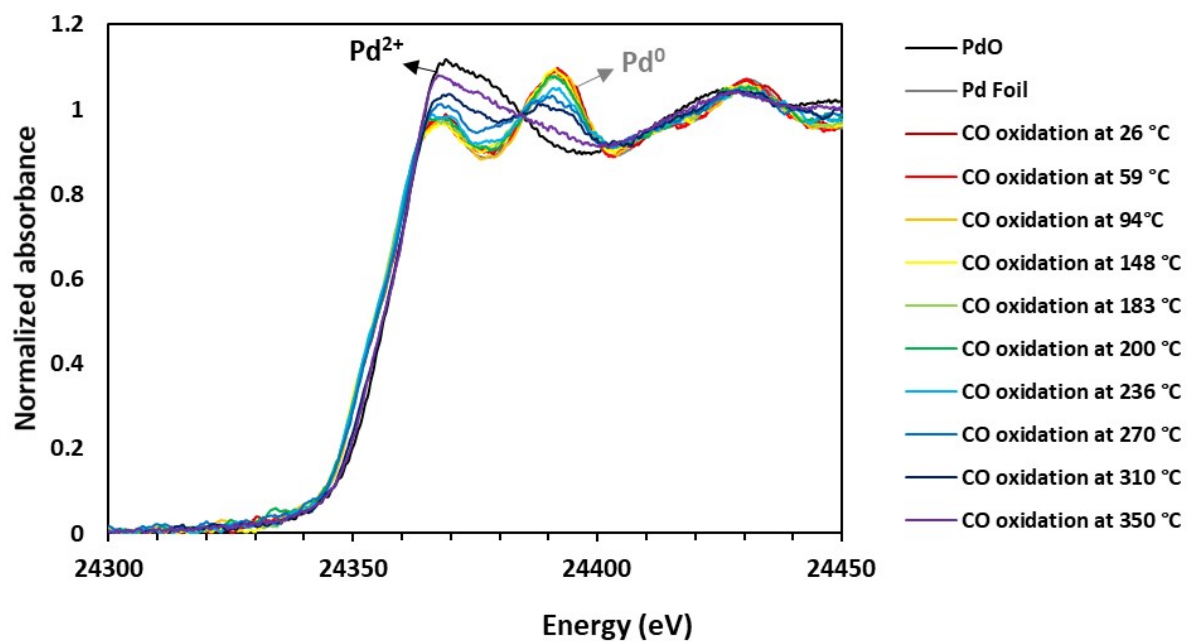

Figure S5: Pd K-edge XANES spectra for CO oxidation recorded during heating processes.

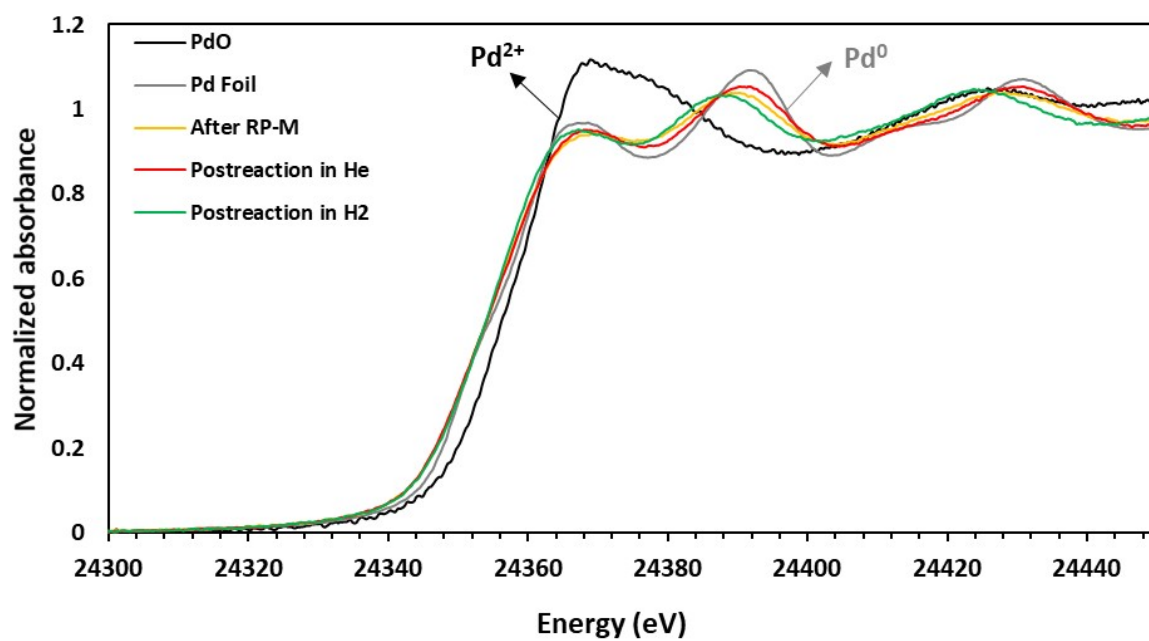

Figure S6: XANES spectra of Pd<sub>TOP</sub>@TiO<sub>2</sub> before and after CO oxidation.

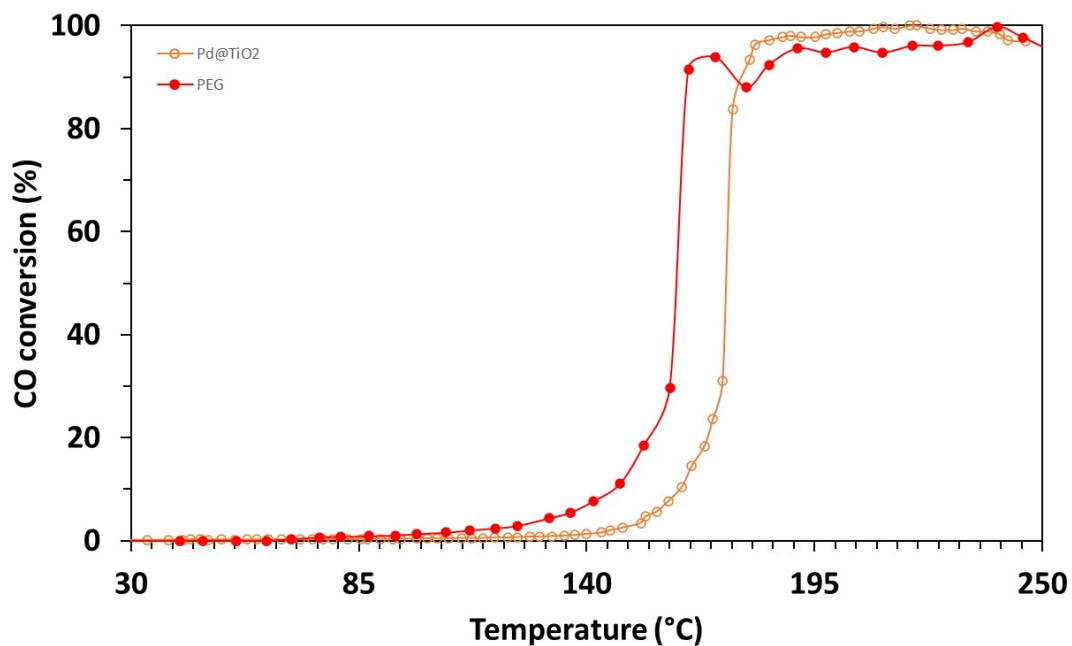

Figure S7: CO conversion during CO oxidation over Pd<sub>TOP</sub>@TiO<sub>2</sub> and Pd<sub>PEG</sub>@TiO<sub>2</sub>, as measured by MS during XAS experiments.

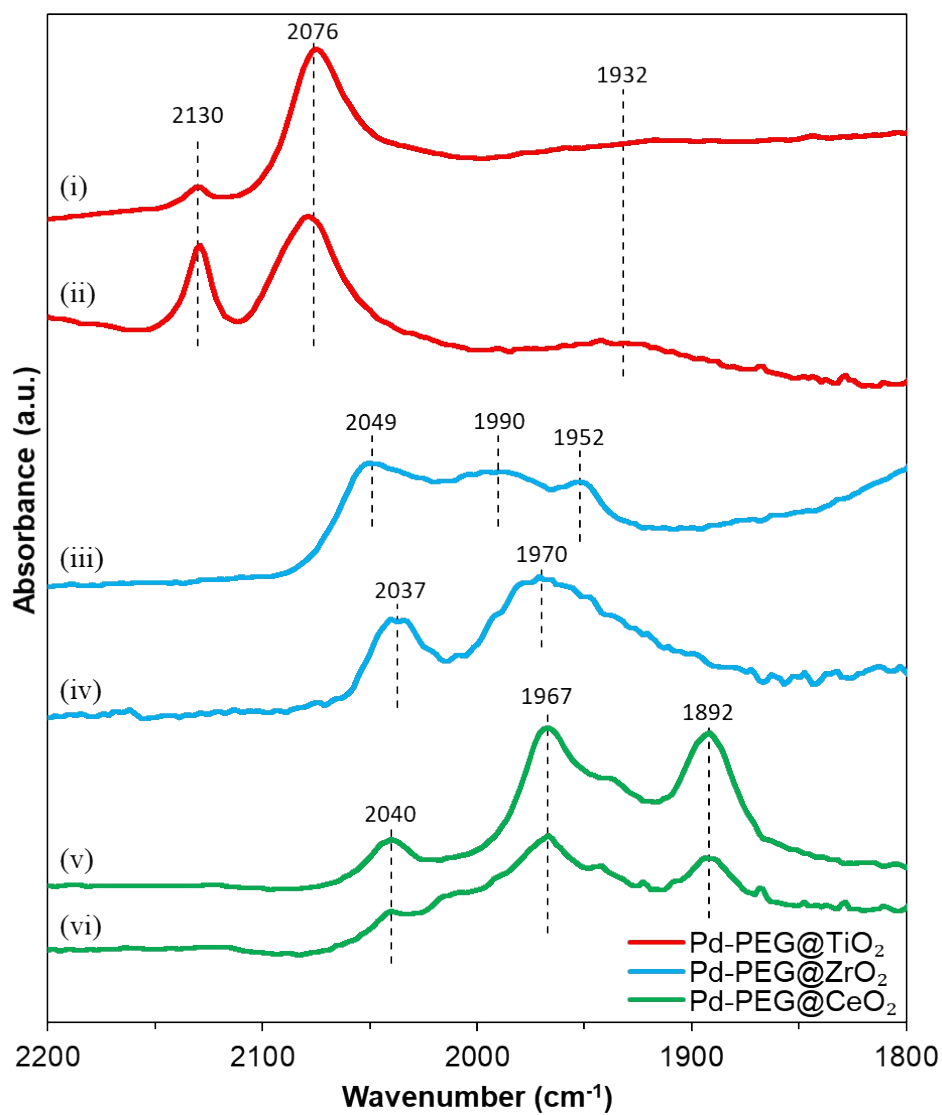



Figure S8: CO DRIFTS spectra of the carbonyl stretch region ( $1800 - 2200 \text{ cm}^{-1}$ ) obtained during minute 5 of CO purge in Ar of (i)  $\text{Pd}_{\text{PEG}}@\text{TiO}_2$  before in-situ CO oxidation reaction, (ii)  $\text{Pd}_{\text{PEG}}@\text{TiO}_2$  after reaction, (iii)  $\text{Pd}_{\text{PEG}}@\text{ZrO}_2$  before in-situ CO oxidation reaction, (iv)  $\text{Pd}_{\text{PEG}}@\text{ZrO}_2$  after reaction, (v)  $\text{Pd}_{\text{PEG}}@\text{CeO}_2$  before in-situ CO oxidation reaction, and (vi)  $\text{Pd}_{\text{PEG}}@\text{CeO}_2$  after reaction.

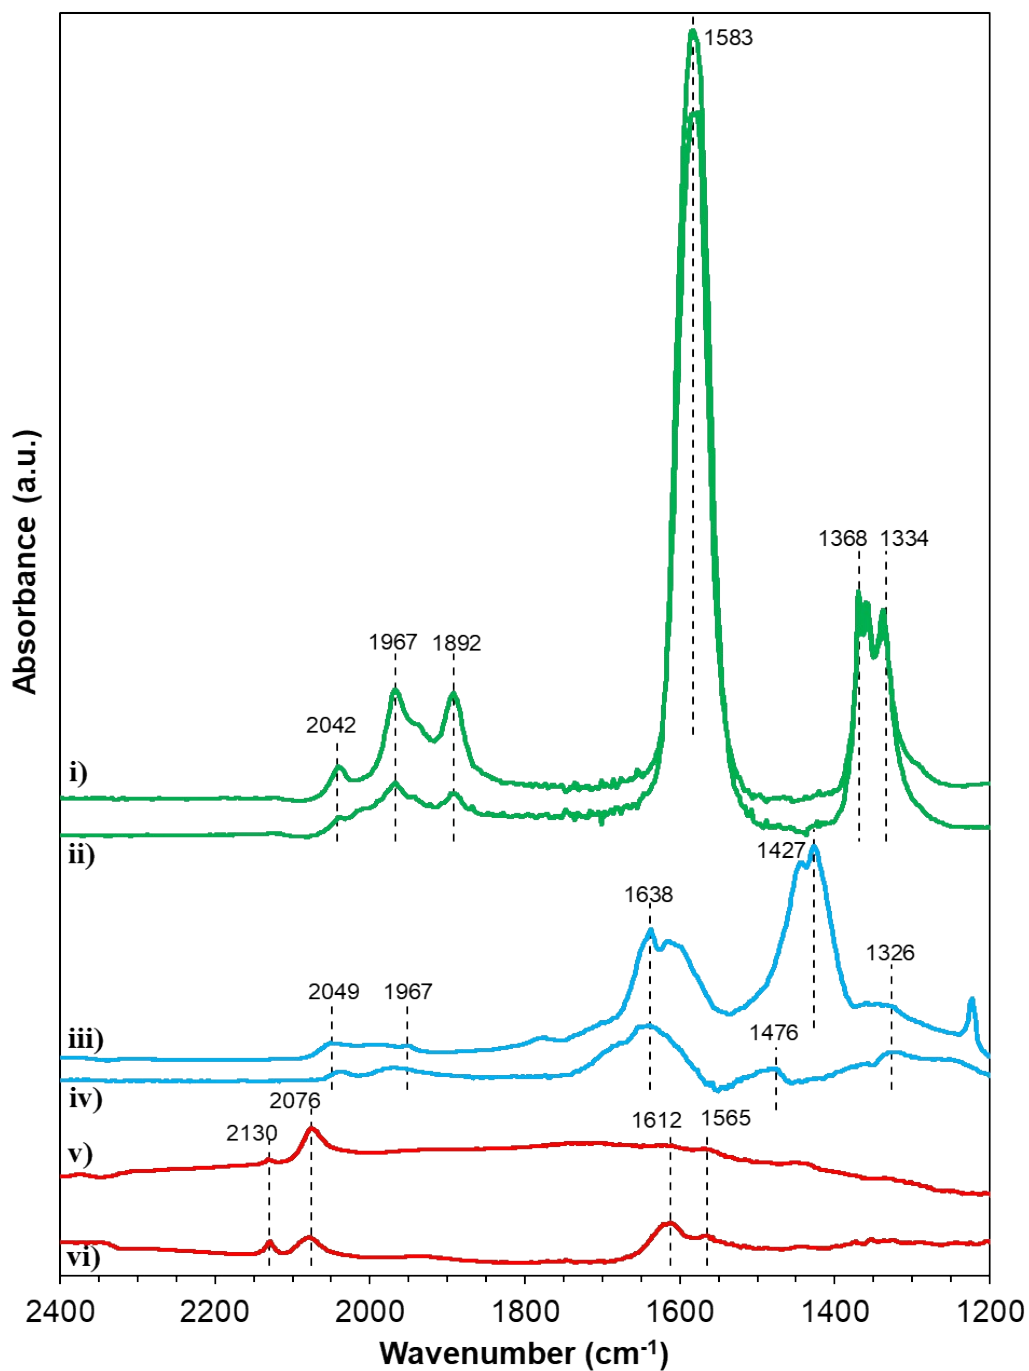

Figure S9: CO DRIFTS full spectra obtained during minute 5 of CO purge in Ar of (i) Pd<sub>PEG</sub>@CeO<sub>2</sub> before in-situ CO oxidation reaction, (ii) Pd<sub>PEG</sub>@CeO<sub>2</sub> after reaction, (iii) Pd<sub>PEG</sub>@ZrO<sub>2</sub> before in-situ CO oxidation reaction, (iv) Pd<sub>PEG</sub>@ZrO<sub>2</sub> after reaction, (v) Pd<sub>PEG</sub>@TiO<sub>2</sub> before in-situ CO oxidation reaction, and (vi) Pd<sub>PEG</sub>@TiO<sub>2</sub> after reaction.

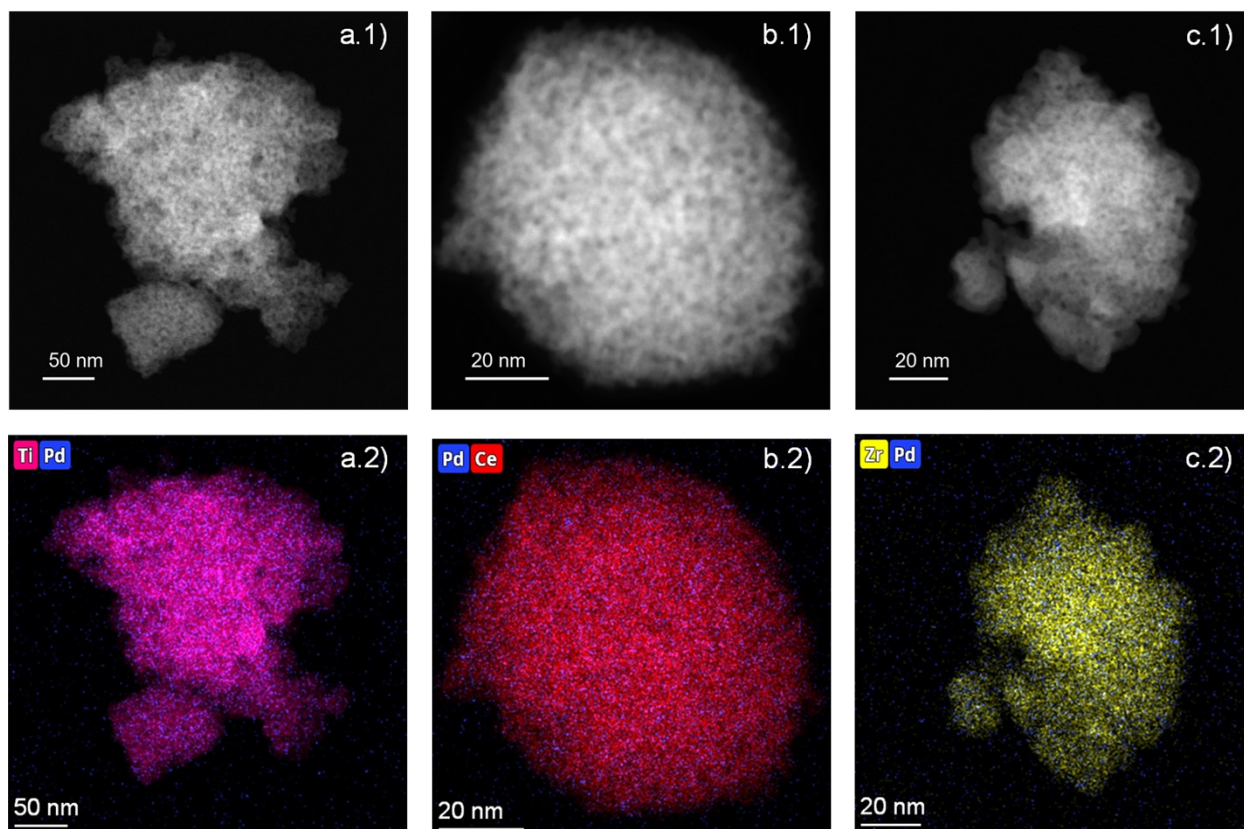

Figure S10: High-resolution scanning transmission electron micrographs (STEM) using high-angle annular dark-field imaging (HAADF) of (a.1) Pd<sub>PEG</sub>@TiO<sub>2</sub>, (b.1) Pd<sub>PEG</sub>@CeO<sub>2</sub> and (c.1) Pd<sub>PEG</sub>@ZrO<sub>2</sub>. (a.2), (b.2) and (c.2) show the related energy dispersive X-ray spectroscopy (EDS) elemental maps of these HAADF-STEM images (Pd: blue, Ti: magenta, Ce: red and Zr: yellow). A redox pretreatment of 400 °C for the oxidation step and 200 °C for the reduction step was used for all samples prior to analysis.

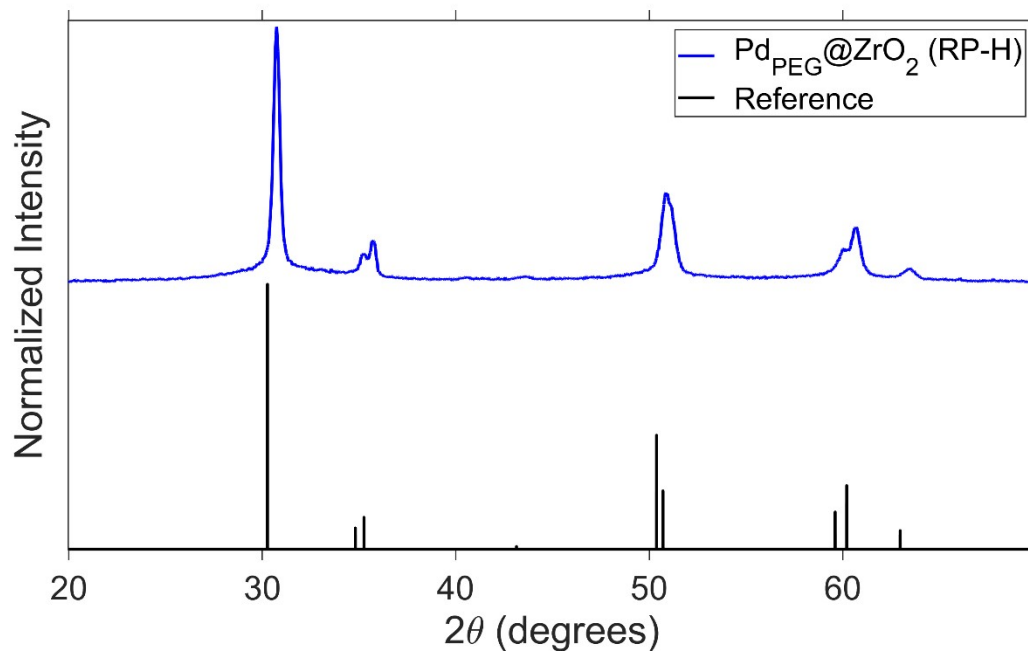

Figure S11: XRD spectrum of Pd<sub>PEG</sub>@ZrO<sub>2</sub> using a redox pretreatment at 400 °C for the oxidation step and 200 °C for the reduction step within tetragonal ZrO<sub>2</sub> as reference.

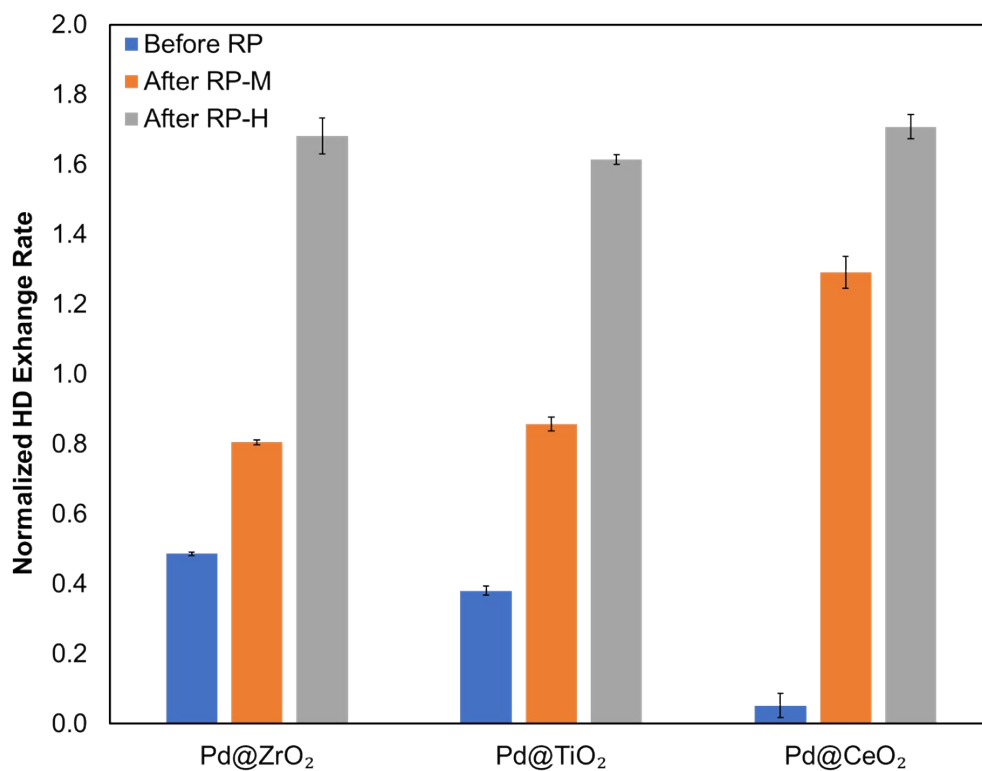

Figure S12: HD exchange rate for Pd<sub>PEG</sub>@ZrO<sub>2</sub>, Pd<sub>PEG</sub>@TiO<sub>2</sub>, and Pd<sub>PEG</sub>@CeO<sub>2</sub> catalysts before pretreatment, after RP-M (moderate-temperature oxidative-reductive treatment) and after RP-H (high-temperature oxidative-reductive treatment). HD exchange activity is normalized to the scrambling rates obtained with the control catalyst (5 wt.% Pd/Al<sub>2</sub>O<sub>3</sub>).

Table S1: Summary of linear combination fit (LCF) results of the Pd K-edge XANES spectra of Pd<sub>TOP</sub>@TiO<sub>2</sub> and Pd<sub>PEG</sub>@TiO<sub>2</sub>.

| Sample Name                         |                                | LCF Results (%) |     | LCF Parameters |          |                  |
|-------------------------------------|--------------------------------|-----------------|-----|----------------|----------|------------------|
|                                     |                                | Pd foil         | PdO | R-factor       | $\chi^2$ | Reduced $\chi^2$ |
| Pd <sub>TOP</sub> @TiO <sub>2</sub> | After pretreatment             | 86              | 14  | 0.0031         | 0.15     | 0.00050          |
|                                     | Postreaction in He             | 91              | 9   | 0.0017         | 0.08     | 0.00027          |
|                                     | Postreaction in H <sub>2</sub> | 87              | 13  | 0.0067         | 0.32     | 0.0011           |
| Pd <sub>PEG</sub> @TiO <sub>2</sub> | After pretreatment             | 99              | 1   | 0.00042        | 0.020    | 0.000072         |
|                                     | Postreaction in He             | 14              | 86  | 0.00068        | 0.038    | 0.00012          |
|                                     | Postreaction in H <sub>2</sub> | 35              | 65  | 0.00064        | 0.034    | 0.00011          |

Table S2: Summary of CO oxidation light-off temperatures and apparent activation energies at moderate temperature (RP-M) and high temperature (RP-H) pretreatments.

| Sample Name                         | Light off at $T_{50}$ , °C<br>(RP-M) | $E_a^{app}$ , kJ mol <sup>-1</sup><br>(RP-M) | Light off at $T_{50}$ , °C<br>(RP-H) | $E_a^{app}$ , kJ mol <sup>-1</sup><br>(RP-H) |
|-------------------------------------|--------------------------------------|----------------------------------------------|--------------------------------------|----------------------------------------------|
| Pd <sub>PEG</sub> @ZrO <sub>2</sub> | 194 ± 4.64                           | 43.8 ± 0.04                                  | 217 ± 0.47                           | 52.0 ± 0.10                                  |
| Pd <sub>PEG</sub> @TiO <sub>2</sub> | 227 ± 1.89                           | 55.0 ± 0.04                                  | 229 ± 5.66                           | 59.8 ± 0.08                                  |
| Pd <sub>PEG</sub> @CeO <sub>2</sub> | 234 ± 1.25                           | 57.1 ± 0.05                                  | 242 ± 1.70                           | 63.7 ± 0.07                                  |

Uncertainties indicate standard deviation of  $T_{50}$  and  $E_a^{app}$  values for three temperature ramps.

Table S3: Summary of H<sub>2</sub>/D<sub>2</sub> exchange rates and estimation of metal surface area and dispersion for Pd<sub>PEG</sub>@ZrO<sub>2</sub>, Pd<sub>PEG</sub>@TiO<sub>2</sub>, and Pd<sub>PEG</sub>@CeO<sub>2</sub> catalysts before pretreatment, after RP-M (moderate-temperature oxidative-reductive treatment) and after RP-H (high-temperature oxidative-reductive treatment).

| Sample Name                               | Treatment                    | H <sub>2</sub> /D <sub>2</sub> scrambling rate<br>[conversion/mg <sub>Pd</sub> ] | Metallic Surface Area<br>[m <sup>2</sup> /g <sub>Pd</sub> ] | Apparent Dispersion <sup>b</sup><br>[%] |
|-------------------------------------------|------------------------------|----------------------------------------------------------------------------------|-------------------------------------------------------------|-----------------------------------------|
| Control Pd/Al <sub>2</sub> O <sub>3</sub> | After treatment <sup>a</sup> | 9.8 ± 0.3                                                                        | 187.0                                                       | 42                                      |
| Pd <sub>PEG</sub> @ZrO <sub>2</sub>       | Before RP                    | 4.8 ± 0.1                                                                        | 91.2 ± 1.5                                                  | 20.5 ± 0.2                              |
|                                           | After RP-M                   | 7.9 ± 0.1                                                                        | 151.0 ± 0.3                                                 | 33.9 ± 0.3                              |
|                                           | After RP-H                   | 16.5 ± 0.5                                                                       | 315.5 ± 2.2                                                 | 70.9 ± 2.2                              |
| Pd <sub>PEG</sub> @TiO <sub>2</sub>       | Before RP                    | 3.8 ± 0.1                                                                        | 71.5 ± 2.3                                                  | 16.1 ± 0.5                              |
|                                           | After RP-M                   | 8.4 ± 0.2                                                                        | 160.8 ± 0.8                                                 | 36.1 ± 0.8                              |
|                                           | After RP-H                   | 15.9 ± 0.1                                                                       | 302.9 ± 0.6                                                 | 68.0 ± 0.6                              |
| Pd <sub>PEG</sub> @CeO <sub>2</sub>       | Before RP                    | 0.5 ± 0.3                                                                        | 9.8 ± 0.3                                                   | 2.2 ± 1.5                               |
|                                           | After RP-M                   | 12.7 ± 0.5                                                                       | 12.7 ± 0.5                                                  | 54.4 ± 1.9                              |
|                                           | After RP-H                   | 16.8 ± 0.3                                                                       | 16.8 ± 0.3                                                  | 71.9 ± 1.5                              |

Uncertainties indicate standard deviations of triplicate runs.

<sup>a</sup>The control catalyst was treated at 250 °C in H<sub>2</sub>/He for one hour, same treatment used before CO chemisorption to obtain percent dispersion.

<sup>b</sup>Dispersion is defined as the fraction of exposed metal active sites obtained from H<sub>2</sub>/D<sub>2</sub> scrambling activity.
